# Supplementary material for: Strain sensor based on a flexible polyimide ionogel for application in high- and low-temperature environments
Source: Royal Society of Chemistry journal article supplement (doi:10.1039/c9tc02719j), 2019-01-01
Supplement: c9tc02719j1.pdf [file c9tc02719j1.pdf]

**Strain Sensor Based on Flexible Polyimide Ionogel for Application in High- and  
Low-Temperature Environments**

Shuangfei Xiang, Shuangshuang Chen, Mengting Yao, Feng Zheng and Qinghua Lu

School of Chemical Science and Engineering, Tongji University, Shanghai, 200092,

China

Correspondence to: Qinghua Lu (E-mail: [16155@tongji.edu.cn](mailto:16155@tongji.edu.cn))

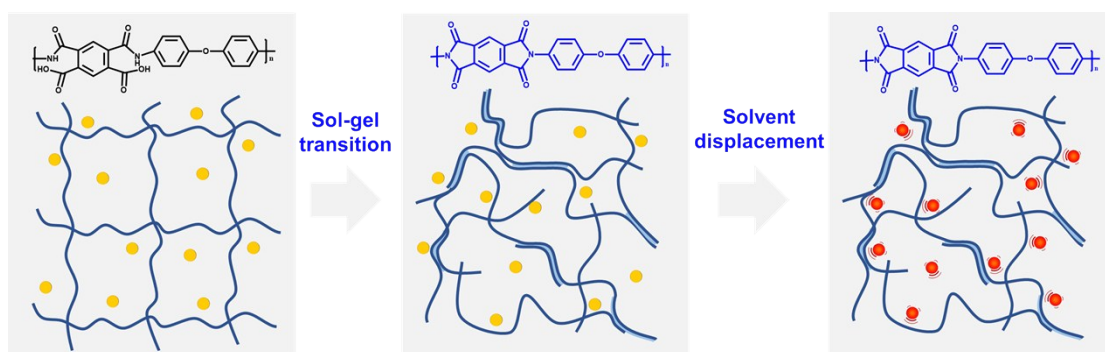

**Figure S1.** Scheme of gelation progress and solvent displacement.

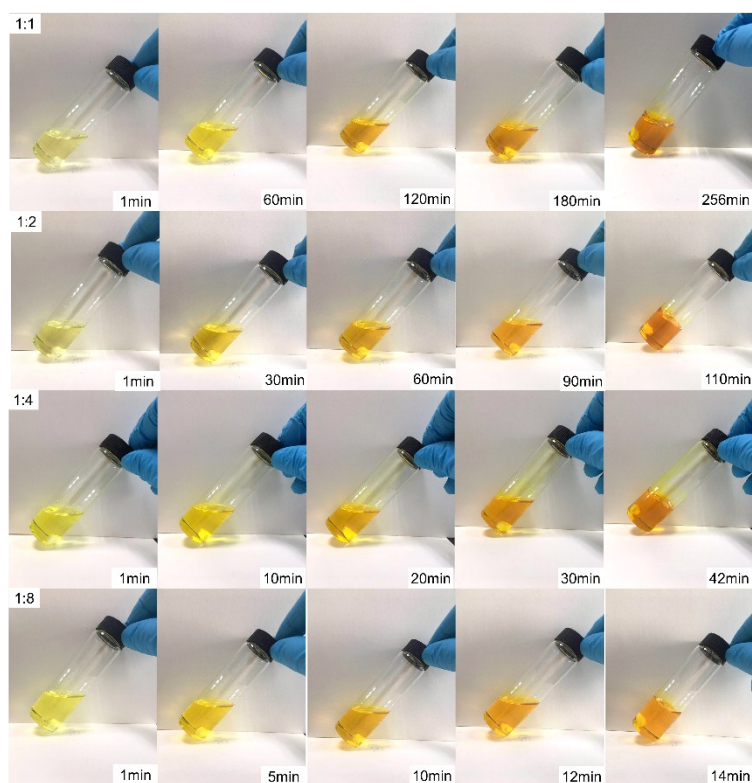

**Figure S2.** Optical images showing gelation progress of PAA after adding different contents of chemical imidization reagents (mole ratio of  $M_{\text{pyridine}}/M_{\text{ODA}}$  was increased from 1/1 to 8/1).

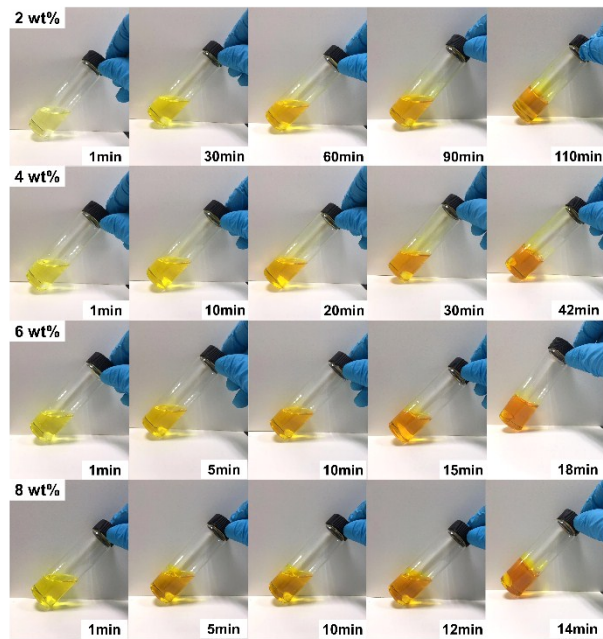

**Figure S3.** Optical images showing gelation progress of PAA after adding chemical imidization reagent. ( $M_{\text{pyridine}}/M_{\text{ODA}}$  was fixed at 4/1, gelation time could be tuned by the PAA concentration from 2 wt%–8 wt%).

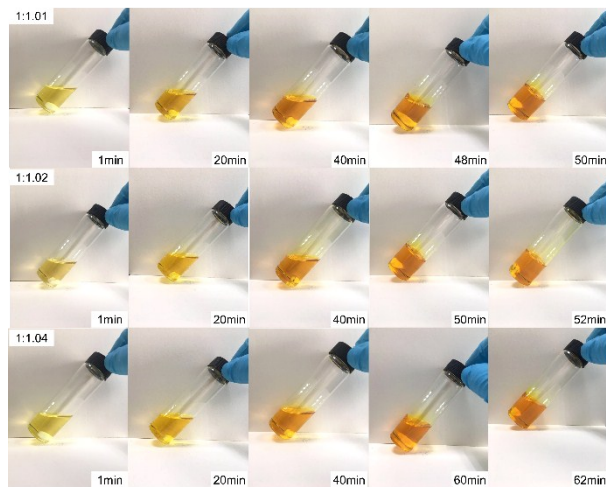

**Figure S4.** Three PAAs with different molecular weights synthesized by varying mole ratio of  $M_{\text{PMDA}}/M_{\text{ODA}}$ . When  $M_{\text{PMDA}}/M_{\text{ODA}}$  was increased from 1.01 to 1.04, the corresponding molecular weight decreased from  $2.2 \times 10^4$  to  $1.1 \times 10^4$ . Optical images showed gelation progress of PAA with different molecular weights after adding chemical imidization reagent ( $C_{\text{PAA}}$  and  $M_{\text{pyridine}}/M_{\text{ODA}}$  fixed at 4 wt% and 4/1, respectively).

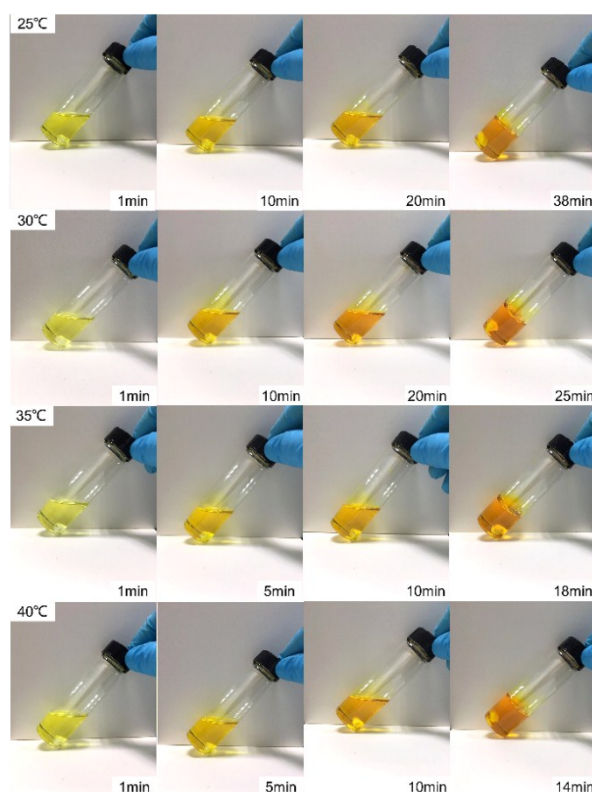

**Figure S5.** Optical images showing gelation progress of PAA after adding chemical imidization reagents in different ambient temperatures ( $C_{\text{PAA}}$  and  $M_{\text{pyridine}}/M_{\text{ODA}}$  were fixed at 4 wt% and 4/1, respectively).

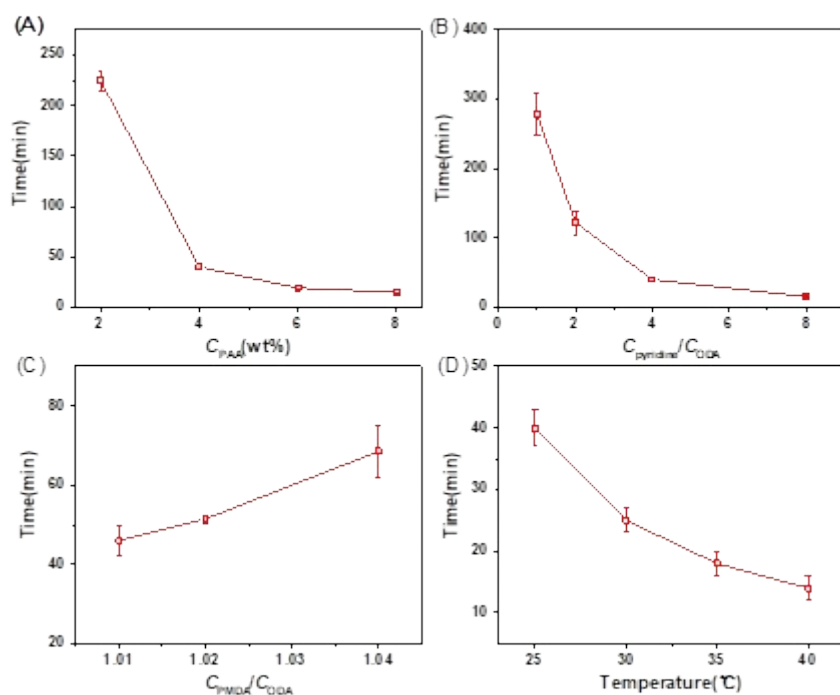

**Figure S6.** Relationship between gelation time and concentration of PAA (A), chemical imidization reagent (B), molecular weight of PAA (C) and chemical imidization temperature (D).

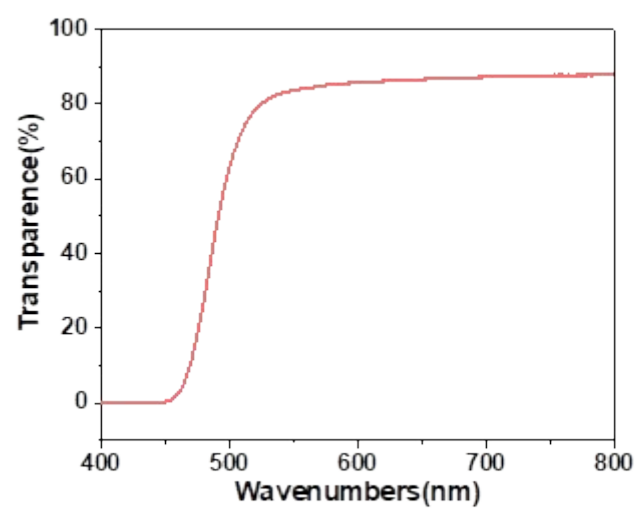

**Figure S7.** UV spectrum of polyimide ionogel.

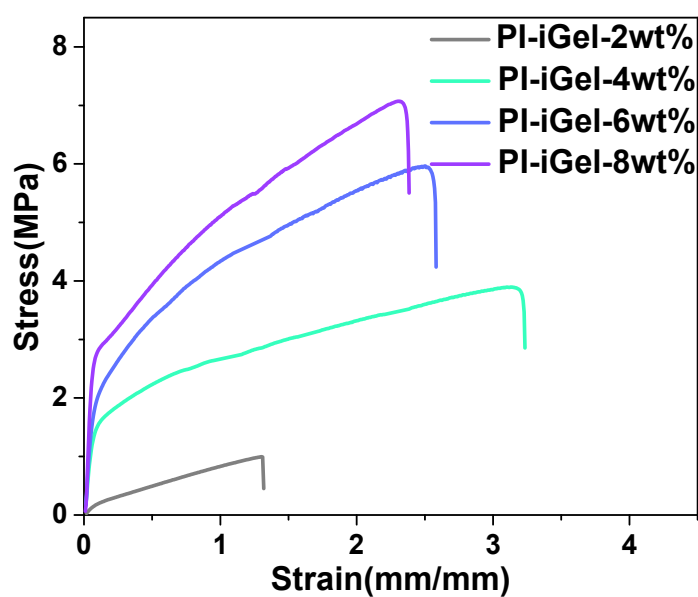

**Figure S8.** The stress-strain curves of PI-iGel

The impedance measurements were taken at  $-60^{\circ}\text{C}$  over a frequency from 100 kHz to 10 mHz. The conductivity of the PI iGel is estimated according to the following equation:

$$\sigma = L / (S \cdot R)$$

where  $L$  is the thickness of the ionogel,  $S$  is the area of the electrode. The bulk resistance of the ionogel,  $R$ , can be calculated from the fitting procedure.

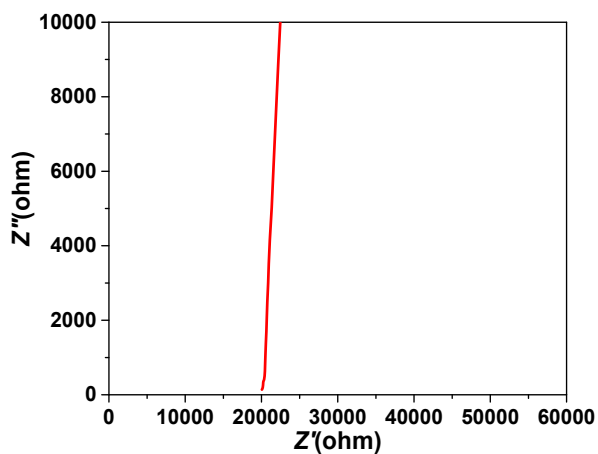

**Figure S9.** Impedance spectra for PI iGel at  $-60^{\circ}\text{C}$ .

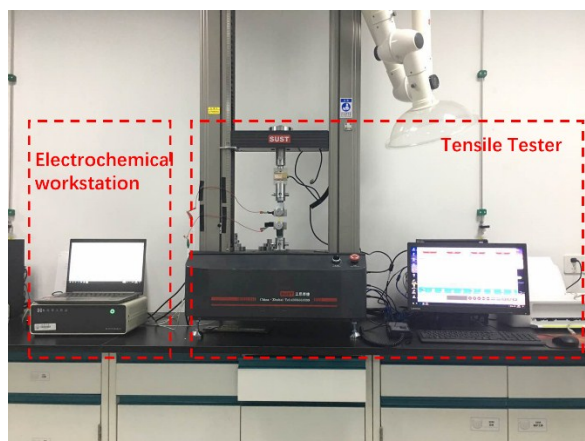

**Figure S10.** Test system for strain-current test

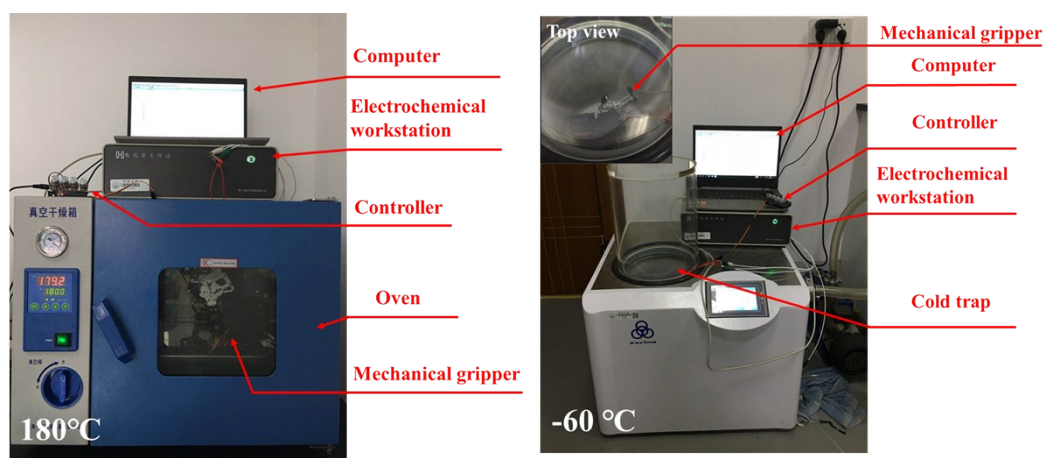

**Figure S11.** Test system for mechanical gripper behavior detection.

### ***Sol–gel fraction, density and void content***

The void content ( $f_{\text{void}}$ ) was calculated as follows:

$$Q_w = (W_{\text{wet}} - W_{\text{dry}})/W_{\text{dry}} \quad (1)$$

The apparent density was calculated as follows:

$$\rho_{\text{app}} = W_{\text{dry}}/V \quad (2)$$

$$f_{\text{void}} = \frac{\frac{Q_w - 1}{\rho_{\text{Sol}}}}{\frac{Q_w - 1}{\rho_{\text{Sol}}} + \frac{1}{\rho_{\text{PI}}}} \quad (3)$$

**Table S1.** Density and void content of polyimide organogels

| Sample       | $\rho_{\text{PI}}$ [g/cm <sup>3</sup> ] | $f_{\text{sol}}$ [%] | $Q_w$ [%]  | $f_{\text{void}}$ [%] |
|--------------|-----------------------------------------|----------------------|------------|-----------------------|
| PI-OGel-2wt% | 1.35±0.07                               | 0.94±0.0006          | 17.55±0.18 | 0.96±0.002            |
| PI-OGel-4wt% | 1.33±0.07                               | 0.92±0.0005          | 11.89±0.07 | 0.94±0.003            |
| PI-OGel-6wt% | 1.36±0.10                               | 0.89±0.0009          | 9.30±0.08  | 0.92±0.006            |
| PI-OGel-8wt% | 1.35±0.03                               | 0.87±0.0006          | 7.89±0.04  | 0.91±0.002            |



**Table S2.** Comparison of PI ionogel and other ionogel systems in ionic liquid content (IL content), mechanical properties and conductivity.

| System                                 | IL content (wt%) | Tensile stress (MPa) | Tensile strain (%) | Conductivity (mS cm <sup>-1</sup> ) | Work Temperature (°C) | reference        |
|----------------------------------------|------------------|----------------------|--------------------|-------------------------------------|-----------------------|------------------|
| BMIMCl/CS/PHEM A Ionogel               | 80               | 0.08                 | ~500               | 23.2                                | 25~200                | 1                |
| PMMA-Silica Nanocomposites Ionogel     | 76               | 3.5                  | 200                | 1.01                                | N.A.                  | 2                |
| Poly(1,2,3-triazolium ionic liquid)s   | 100              | 1.2                  | 22                 | 10 <sup>-5</sup>                    | ~200                  | 3                |
| PAMPS-based DN Ionogel                 | 66.4             | 0.38                 | 158                | 17–24                               | -70~100               | 4                |
| P(FMA-co-MMA)/P(VDF-co-HFP) DN Ionogel | 80               | 0.66                 | 268                | 3.3                                 | -40~80                | 5                |
| Pseudo PI Ionogel                      | 75               | 7.2                  | 12                 | 2.79                                | 25~160                | 6                |
| <b>PI-igels</b>                        | <b>85.1-93.1</b> | <b>~7.1</b>          | <b>50-320</b>      | <b>1.9-5.2</b>                      | <b>-60~250</b>        | <b>This work</b> |

### Reference

- (1) Liu, X.; Wen, Z.; Wu, D.; Wang, H.; Yang, J.; Wang, Q. Tough BMIMCl-based ionogels exhibiting excellent and adjustable performance in high-temperature supercapacitors. *Journal of Materials Chemistry A* **2014**, *2* (30), 11569-11573.
- (2) Gayet, F.; Viau, L.; Leroux, F.; Mabile, F.; Monge, S.; Robin, J.-J.; Vioux, A. Unique combination of mechanical strength, thermal stability, and high ion conduction in PMMA– Silica nanocomposites containing high loadings of ionic liquid. *Chemistry of Materials* **2009**, *21* (23), 5575-5577.
- (3) Obadia, M. M.; Mudraboyina, B. P.; Serghei, A.; Montarnal, D.; Drockenmuller, E. Reprocessing and recycling of highly cross-linked ion-conducting networks through transalkylation exchanges of C–N bonds. *Journal of the American Chemical Society* **2015**, *137* (18), 6078-6083.
- (4) Yi, D.; Zhang, J.; Li, C.; Zhang, X.; Liu, H.; Lei, J. Preparation of High-Performance Ionogels with Excellent Transparency, Good Mechanical Strength, and High Conductivity. *Advanced Materials* **2017**, *29* (47), 1704253.
- (5) Tang, Z.; Lyu, X.; Xiao, A.; Shen, Z.; Fan, X. High-Performance Double-Network Ion Gels with Fast Thermal Healing Capability via Dynamic Covalent Bonds. *Chemistry of Materials* **2018**, *30* (21), 7752-7759.
- (6) Wang, Q.; Jian, Z.; Song, W.-L.; Zhang, S.; Fan, L.-Z. Facile fabrication of safe and robust polyimide fibrous membrane based on triethylene glycol diacetate-2-propenoic acid butyl ester gel electrolytes for lithium-ion batteries. *Electrochimica Acta* **2014**, *149*, 176-185.
